# Supplementary material for: Mechanochemical Symmetry Breaking in Hydra Aggregates
Source: PubMed Central journal article supplement — Biophys J. 2015 May 5;108(9):2396–407. doi: 10.1016/j.bpj.2015.03.033 (PMC4423050; doi:10.1016/j.bpj.2015.03.033), 2015-05-05
Supplement: mmc1.pdf [file mmc1.pdf]

**SUPPORTING MATERIAL**  
Mechanochemical Symmetry Breaking in *Hydra*  
Aggregates

Moritz Mercker<sup>1</sup>  
Institute of Applied Mathematics, BioQuant and IWR,  
University of Heidelberg, Heidelberg, Germany

Alexandra Köthe  
Institute of Applied Mathematics,  
University of Heidelberg, Heidelberg, Germany

Anna Marciniak-Czochra  
Institute of Applied Mathematics, BioQuant and IWR,  
University of Heidelberg, Heidelberg, Germany

<sup>1</sup>Corresponding author. Address: Institute of Applied Mathematics, BioQuant and Interdisciplinary Center of Scientific Computing (IWR), University of Heidelberg, Heidelberg, Germany, Tel.: 0049 163 2357602

## PARAMETERS AND INITIAL CONDITIONS

In the following, we show the detailed parameter values we have used for presented simulations.

**OMC model:** Due to the reduced complexness of the used model (e.g., curved 2D surfaces instead of real 3D bodies) a direct parametrization by experimentally determined parameters was not possible. Instead, model parameters have been chosen such that simulated space and time scales fit to the experimental results, guided by the behavior of an aggregate of “ideal size”. Especially, parametrization has been chosen such that symmetry breaking occurs after five oscillations where  $t_{SB} = 21.4 h$  is minimal for a size of  $r = 138 \mu m$  (1). By setting  $v_{phys} = \epsilon_v v_{abs}$ , we transformed temporal ( $v = t$ ) and spatial ( $v = \vec{X}$ ) abstract dimensionless quantities  $v_{abs}$  by a characteristic unit of measure  $\epsilon_v$  into a physical reasonable variable  $v_{phys}$ . Concretely, we used  $\epsilon_t = 173.97 h$  for temporal and  $\epsilon_X = 138 \mu m$  for spacial scales. Most other variables we have kept dimensionless; especially we have used (as not otherwise stated):  $\Delta C_{eff} = 30$ ,  $\alpha = 1$ ,  $\kappa_1 = 100$ ,  $\lambda = 300$ ,  $\xi = 500$ ,  $\kappa_3 = 1$ ,  $\beta = (1.25)^2$ ,  $t_{heal} - t_{rupt} = 5 min$ ,  $L = 1$ ,  $D_A = 27.5$ ,  $C_A = 174$ ,  $\tilde{D}_B = 5250$  and  $C_B = 350$ . As initial morphogen distribution we have always set  $\Phi_A$  and  $\Phi_B$  stochastically and uniformly distributed in the interval  $[1.0, 1.1]$ .

**Turing model:** We use  $c_1(r_0) = 0.0004362997r_0 - 0.0209382395$  and  $u_{threshold} = e$ . For every fit, we generated randomly an initial guess fulfilling the Turing conditions and use them for MATLABs built-in function `fmincon`. We assume that  $D_u < D_v (< D_w)$  and use the transformation  $\tilde{t} = D_u t$  to reduce the parameter space.

**Curvature-increasing model:** Based on the model presented in Mercker et al. (2), we have always used the parameters  $L_X = 1.0$ ,  $\kappa = 0.01$ ,  $\gamma = 0.4$ ,  $\delta = 1.0$  and  $\beta = 1.0$ , where  $\zeta$  (respectively  $\tilde{\zeta}$ ) and system size have been varied. For all simulations of this model we assumed as the initial tissue geometry a sphere as well as a stochastic distribution for the morphogen concentration  $\Phi$ , uniformly distributed in the interval  $[0, 0.05]$ .

**SOC model:** In accordance with the model of Gamba et al. (3) we have used an average conservation level of  $C = 0.95$ . Furthermore, we have considered the  $\nu \rightarrow 0$  limit as described by Jensen (4). All SOC simulations were started with an always newly generated stochastic distribution for the *Ks1*-promoting factor, uniformly distributed below the threshold value.

## FITTING PARAMETERS

Here, we present parameters for analytical fitting curves used within different figures in the main manuscript.

Fig. 2E: grey solid line:  $-0.234 \Delta C_{eff} + 0.015$ .

Fig. 2 F: grey solid line:  $10.323 (\tanh(0.0117 r_0 - 1.680) + 0.747)$ .

Fig. 4 C: grey dashed line:  $64.646 / (2.551 s^{0.3} - 1)$ .

Fig. 4 C: grey solid line:  $20. + 34.285 / (2s)$ .

Fig. 4 E: grey solid line: linearly interpolated values as a guide to the eye.

Fig. 5 A-C: black solid line: experimental data given by  $21.4 + 152.3(r_0/138 - 1)^2$  (taken from Soriano et al. (1)).

Fig. 5 A: Diffusion coefficients  $D_u = 2724, D_v = 4723677$ , entries of the Jacobian  $f_u = 0.931, f_v = 1, g_u = -2f_u g_v, g_v = -158.276$ .

Fig. 5 B: For simulation data we have used  $\zeta = 8.0$  with temporal scaling  $1.3 t_c = t h$  and spacial scaling  $189 r_c = r \mu m$  (where  $v_c$  are the abstract dimensionless variables used within the model).

Fig. 5 C: For simulation data we have used the temporal scaling  $(1/57) z = t h$ , where  $z$  is the number of cascades.

## CALCULUS OF VARIATIONS

To obtain the detailed dynamic tissue surface equations (eq. 7, main manuscript), we need to calculate normal variations (i.e., with respect to  $\vec{X} \cdot \vec{n}$ ), in the following in the strong formulation denoted by  $\frac{\delta^\perp}{\delta \vec{X}} \mathcal{F}[\dots]$ , in the weak formulation by  $\delta^\perp[\dots]$ . For technical details and further definitions concerning this approach, we refer to Mercker et al. (5). Since variations of  $\mathcal{F}_{bend}$  can be already found in Mercker et al. (5), here, we restrict our calculations to normal variations of  $\mathcal{F}_{osm}$  and  $\mathcal{F}_{comp}$ , respectively.

*Lemma 1:* It holds:

$$\frac{\delta^\perp}{\delta \vec{X}} [\mathcal{F}_{osm}] = \kappa_1 \left( \int_{\Omega} d\vec{V} - V(t) \right).$$

*Proof:* Using the product rule as well as  $\frac{\delta^\perp}{\delta \vec{X}} [c \int_{\Omega} d\vec{V}] = c$  for any constant  $c$  (6, 7) yields

$$\frac{\delta^\perp}{\delta \vec{X}} [\mathcal{F}_{osm}] = \kappa_1 \left( \int_{\Omega} d\vec{V} - V(t) \right) \frac{\delta^\perp}{\delta \vec{X}} \left[ \int_{\Omega} d\vec{V} \right] = \kappa_1 \left( \int_{\Omega} d\vec{V} - V(t) \right). \quad \square$$

*Lemma 2:* It holds:

$$\frac{\delta^\perp}{\delta \bar{X}} [\mathcal{F}_{comp}] = \sqrt{g} H \kappa_2 (\sqrt{g} - \sqrt{g_0}) / \sqrt{g_0}.$$

*Proof:* Using the product rule as well as  $\delta^\perp[\sqrt{g}] = H\sqrt{g}\psi$  with test function  $\psi$  (7) yields

$$\delta^\perp [\mathcal{F}_{comp}] = \int_{S^2} \kappa_2 (\sqrt{g} - \sqrt{g_0}) / \sqrt{g_0} \delta^\perp[\sqrt{g}] d\vec{s}. \quad \square$$

## TURING CONDITIONS

Here, we describe the conditions for the entries of  $2 \times 2$  and  $3 \times 3$  matrices leading to diffusion-driven instability. We denote the eigenvalues of the Laplacien by  $\mu_\ell(r_0) = \ell(\ell + 1)/r_0^2$ .

The matrix  $J = \begin{pmatrix} f_u & f_v \\ g_u & g_v \end{pmatrix}$  has eigenvalues with negative real parts iff  $\text{tr } J < 0$  and  $\det J > 0$ . The matrix  $J_\ell(r_0)$  may have positive eigenvalues if  $f_u > 0$  or  $g_v > 0$  holds. For suitable diffusion coefficients this leads for a certain range of  $r_0$  to

$$\det J_\ell^2(r_0) = \det J - (f_u D_v + g_v D_u) \mu_\ell(r_0) + D_u D_v \mu_\ell^2(r_0) < 0.$$

For the  $3 \times 3$  matrix  $J = \begin{pmatrix} f_u & f_v & f_w \\ g_u & g_v & g_w \\ h_u & h_v & h_w \end{pmatrix}$ , we define

$$\Sigma J := \det \begin{pmatrix} f_u & f_v \\ g_u & g_v \end{pmatrix} + \det \begin{pmatrix} f_u & f_w \\ h_u & h_w \end{pmatrix} + \det \begin{pmatrix} g_v & g_w \\ h_v & h_w \end{pmatrix}.$$

$J$  has eigenvalues with negative real parts, if and only if it holds (8)

$$\text{tr } J < 0, \det J < 0 \quad \text{and} \quad \text{tr } J \cdot \Sigma J - \det J < 0.$$

$J_\ell(r_0)$  may have eigenvalues with positive real parts if at least one of the conditions

$$f_u < 0, g_v < 0, h_w < 0, \det \begin{pmatrix} f_u & f_v \\ g_u & g_v \end{pmatrix} > 0, \det \begin{pmatrix} f_u & f_w \\ h_u & h_w \end{pmatrix} > 0 \text{ and } \det \begin{pmatrix} g_v & g_w \\ h_v & h_w \end{pmatrix} > 0$$

is violated. For suitable choices of the diffusion coefficients this leads for a certain range of  $r_0$  to

$$\begin{aligned} \det J_\ell(r_0) = & \det J - \mu_\ell(r_0) \left( D_u \det \begin{pmatrix} g_v & g_w \\ h_v & h_w \end{pmatrix} + D_v \det \begin{pmatrix} f_u & f_w \\ h_u & h_w \end{pmatrix} + D_w \det \begin{pmatrix} f_u & f_v \\ g_u & g_v \end{pmatrix} \right) \\ & + \mu_\ell^2(r_0) (f_u D_v D_w + g_v D_u D_w + h_w D_u D_v) - \mu_\ell^3(r_0) D_u D_v D_w > 0 \end{aligned}$$

or to

$$\begin{aligned}
& \text{tr } J_\ell(r_0) \cdot \Sigma J_\ell(r_0) - \det J_\ell(r_0) = (\text{tr } J \cdot \Sigma J - \det J) \\
& - \mu_\ell(r_0) \left( (D_u + D_v) \det \begin{pmatrix} f_u & f_v \\ g_u & g_v \end{pmatrix} + (D_u + D_w) \det \begin{pmatrix} f_u & f_w \\ h_u & h_w \end{pmatrix} \right. \\
& \quad \left. + (D_v + D_w) \det \begin{pmatrix} g_v & g_w \\ h_v & h_w \end{pmatrix} \right. \\
& \quad \left. + (f_u + g_v + h_w)(f_u(D_v + D_w) + g_v(D_u + D_w) + h_w(D_u + D_v)) \right) \\
& + \mu_\ell^2(r_0) \left( 2(f_u + g_v + h_w)(D_u D_v + D_u D_w + D_v D_w) \right. \\
& \quad \left. + f_u(D_v^2 + D_w^2) + g_v(D_u^2 + D_w^2) + h_w(D_u^2 + D_v^2) \right) \\
& - \mu_\ell^3(r_0) \left( D_u^2(D_v + D_w) + D_v^2(D_u + D_w) + D_w^2(D_u + D_v) + 2D_u D_v D_w \right) > 0.
\end{aligned}$$

## Supporting References

1. Soriano, J., S. Rüdiger, P. Pullarkat, and A. Ott, 2009. Mechano-genetic coupling of Hydra symmetry breaking and driven Turing instability model. *Biophys J* 96:1649–1660.
2. Mercker, M., D. Hartmann, and A. Marciniak-Czochra, 2013. A mechanochemical model for embryonic pattern formation: coupling tissue mechanics and morphogen expression. *PLoS One* 8:e82617.
3. Gamba, A., M. Nicodemi, J. Soriano, and A. Ott, 2012. Critical behavior and axis defining symmetry breaking in Hydra embryonic development. *Phys Rev Lett* 108:158103.
4. Jensen, H., 1998. Self-Organized Criticality. Cambridge Lecture Notes in Physics.
5. Mercker, M., A. Marciniak-Czochra, T. Richter, and D. Hartmann, 2013. Modeling and computing of deformation dynamics of inhomogeneous biological surfaces. *SIAM Journal on Applied Mathematics (SIAP)* 73(5):17681792.
6. Taniguchi, T., 1996. Shape deformation and phase separation dynamics of two-component vesicles. *Phys Rev Lett* 76:4444–4447.
7. Zhong-Can, O., and W. Helfrich, 1989. Bending energy of vesicle membranes: General expressions for the first, second, and third variation of

the shape energy and applications to spheres and cylinders. *Phys Rev A* 39:5280–5288.

8. Gantmacher, F. R. 1959. *The Theory of Matrices 2 Chelsea, New York.*
